# Supplementary material for: Fourth stable radical species in X-irradiated solid-state sucrose
Source: Royal Society of Chemistry journal article supplement (doi:10.1039/c6cp01118g), 2016-01-01
Supplement: c6cp01118g1.pdf [file c6cp01118g1.pdf]

## **Fourth stable radical species in X-irradiated solid-state sucrose**

Jevgenij Kusakovskij<sup>1</sup>, Ignacio Caretti<sup>2</sup>, Sabine Van Doorslaer<sup>2</sup>, Freddy Callens<sup>1</sup> and Henk Vrielinck<sup>1</sup>

<sup>1</sup> Ghent University, Department of Solid State Sciences, Krijgslaan 281-S1, 9000 Ghent, Belgium

<sup>2</sup>Antwerp University, Department of Physics, Universiteitsplein 1, 2610 Wilrijk, Belgium

**Supporting information**

**Figure S1.** Angular dependence of the Q-band EIE spectra of the fourth radical species recorded at 110 K: experiment (black) and simulation (red) of the absorption EPR spectra using the experimental tables from Table 1 and Figure 1.

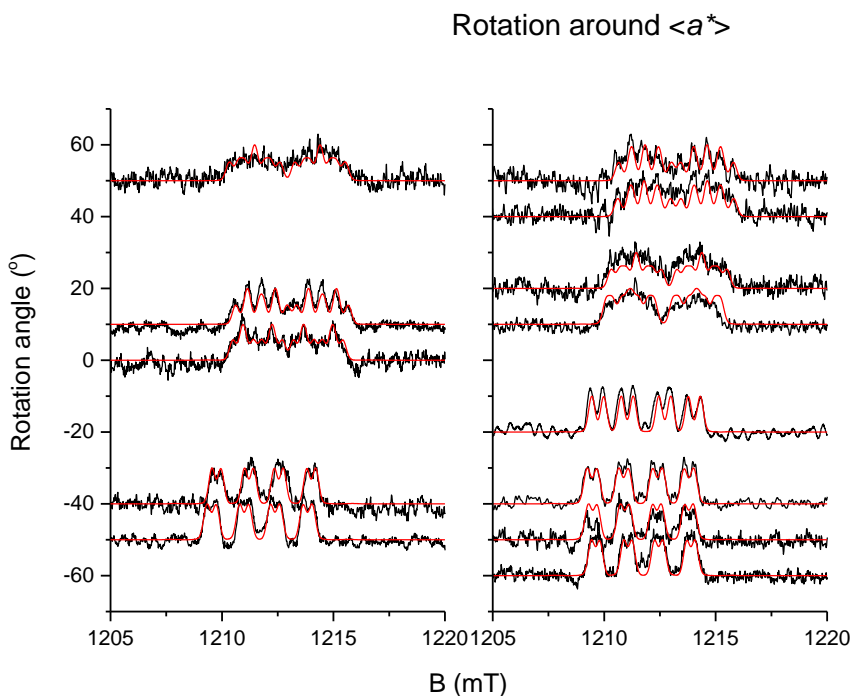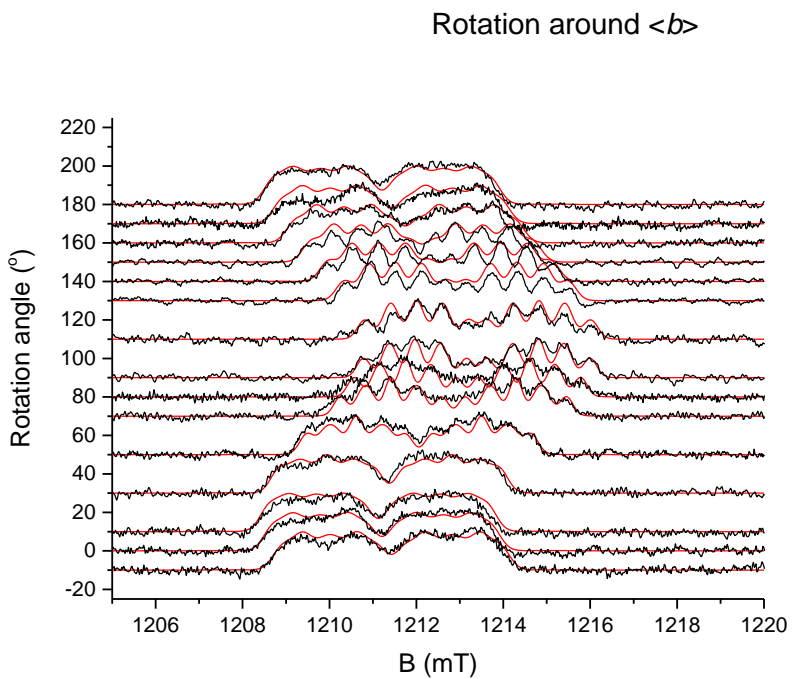

Rotation around  $\langle c \rangle$

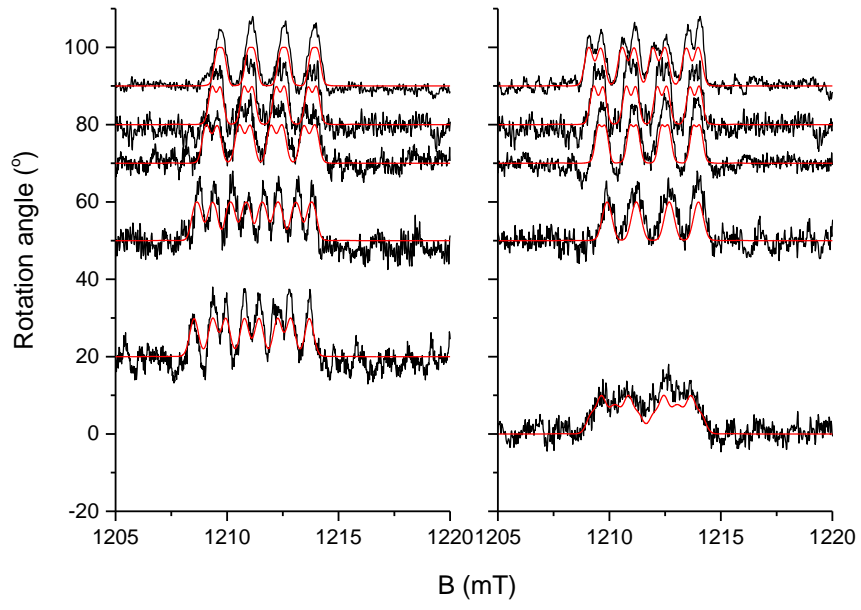

**Table S1.** Schonland conjugates of the experimental tensors (Table 1) of the fourth radical species in X-irradiated sucrose. Principal values of the g tensor are also presented as shifts  $\delta g_i$  ( $i = \{1,2,3\}$ ) from the free electron g-value  $g_e = 2.002319$  and expressed in ppt. HF tensors are expressed in MHz.

| Tensor       | g-value | Iso    | $\delta g_i$ /Aniso | Eigenvectors |        |        |
|--------------|---------|--------|---------------------|--------------|--------|--------|
|              |         |        |                     | $a^*$        | $b$    | $c$    |
| <b>g</b>     | 2.00173 |        | -0.59               | 0.397        | 0.223  | 0.890  |
|              | 2.00484 |        | 2.52                | -0.313       | -0.879 | 0.360  |
|              | 2.00596 |        | 3.64                | 0.863        | -0.422 | -0.278 |
| $\beta$ 1-HF |         | 80.23  | -5.48               | 0.505        | 0.640  | 0.579  |
|              |         |        | 0.82                | -0.839       | 0.204  | 0.505  |
|              |         |        | 4.66                | 0.205        | -0.740 | 0.640  |
| $\beta$ 2-HF |         | 36.22  | -3.84               | 0.432        | -0.279 | 0.858  |
|              |         |        | -2.42               | -0.794       | 0.334  | 0.508  |
|              |         |        | 6.26                | -0.428       | -0.901 | -0.077 |
| $\beta$ 3-HF |         | -15.78 | -7.96               | 0.799        | -0.593 | 0.098  |
|              |         |        | -3.36               | -0.123       | -0.001 | 0.992  |
|              |         |        | 11.32               | -0.588       | -0.805 | -0.074 |
| hydroxy-HF   |         | -6.11  | -11.27              | 0.645        | -0.341 | 0.684  |
|              |         |        | -5.48               | 0.650        | -0.227 | -0.725 |
|              |         |        | 16.75               | 0.402        | 0.912  | 0.075  |

**Table S2.** Comparison of the experimental HF tensors, (expressed in MHz,) in the reference frame of the **g** tensor to the calculated tensors, using the structure in Figure 5B.

|     |        | $\beta_1$ -HF    |            |          | $\beta_2$ -HF    |    |  | $\beta_3$ -HF     |   |  | hydroxy-HF        |   |  |  |
|-----|--------|------------------|------------|----------|------------------|----|--|-------------------|---|--|-------------------|---|--|--|
|     |        | Iso→             |            |          | Aniso→           |    |  | Aniso→            |   |  | Aniso→            |   |  |  |
|     |        | 80.12            |            |          | 36.22            |    |  | -15.78            |   |  | -7.07             |   |  |  |
|     |        | -4.31 -1.45 5.76 |            |          | -3.84 -2.42 6.26 |    |  | -8.09 -3.07 11.17 |   |  | -7.96 -6.56 14.52 |   |  |  |
|     |        | <i>a</i> *       |            |          | <i>a</i> *       |    |  | <i>a</i> *        |   |  | <i>a</i> *        |   |  |  |
|     |        | <i>b</i>         |            |          | <i>b</i>         |    |  | <i>b</i>          |   |  | <i>b</i>          |   |  |  |
|     |        | <i>c</i>         |            |          | <i>c</i>         |    |  | <i>c</i>          |   |  | <i>c</i>          |   |  |  |
|     | Iso    | Aniso            | <i>a</i> * | <i>b</i> | <i>c</i>         |    |  |                   |   |  |                   |   |  |  |
| H1  | -13.02 | -6.71            | 0.003      | -0.142   | 0.990            |    |  |                   | 5 |  |                   |   |  |  |
|     |        | -3.52            | 1.000      | -0.002   | -0.003           |    |  |                   | 4 |  |                   |   |  |  |
|     |        | 10.23            | 0.002      | 0.990    | 0.142            |    |  |                   | 5 |  |                   |   |  |  |
| H3b | 38.03  | -3.56            | 0.964      | 0.006    | -0.265           | 22 |  |                   |   |  |                   |   |  |  |
|     |        | -2.38            | -0.111     | -0.899   | -0.424           | 23 |  |                   |   |  |                   |   |  |  |
|     |        | 5.94             | -0.241     | 0.438    | -0.866           | 9  |  |                   |   |  |                   |   |  |  |
| H3a | 67.35  | -3.50            | 0.591      | -0.806   | 0.027            | 2  |  |                   |   |  |                   |   |  |  |
|     |        | -2.71            | -0.701     | -0.530   | -0.476           | 3  |  |                   |   |  |                   |   |  |  |
|     |        | 6.21             | 0.399      | 0.262    | -0.879           | 4  |  |                   |   |  |                   |   |  |  |
| H2  | -9.61  | -10.74           | 1.000      | -0.008   | -0.006           |    |  |                   | 5 |  |                   |   |  |  |
|     |        | -3.00            | 0.010      | 0.834    | 0.552            |    |  |                   | 5 |  |                   |   |  |  |
|     |        | 13.74            | 0.001      | -0.552   | 0.834            |    |  |                   |   |  |                   | 2 |  |  |
